# Supplementary material
Source: Springer Nature journal article supplement (https://www.springermedizin.de/resource/supplementary/12990_2007_113_MOESM4_ESM.pdf/9612594)

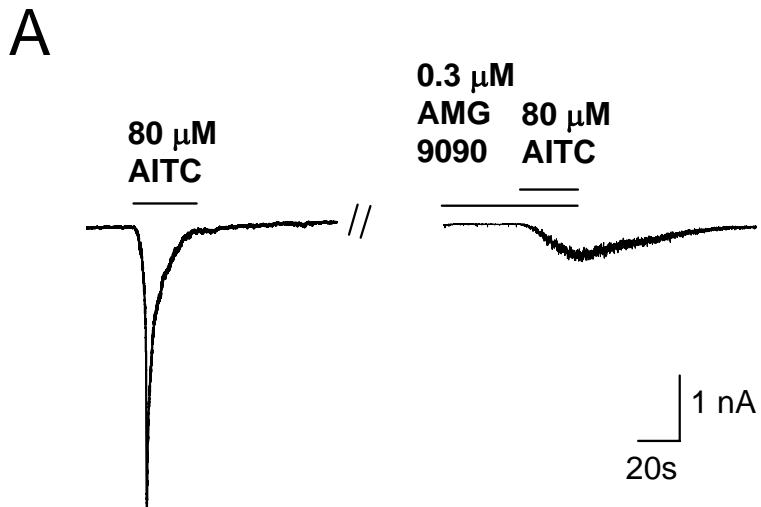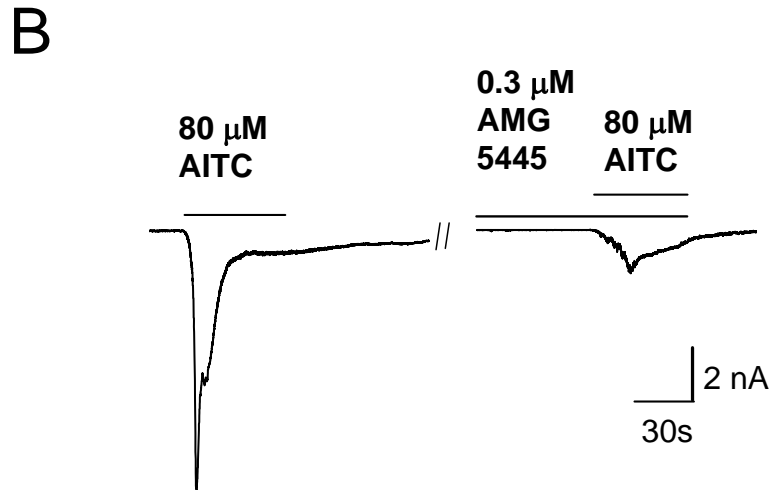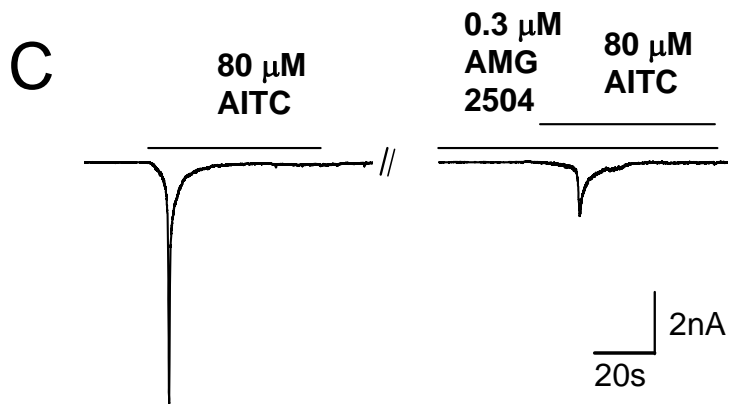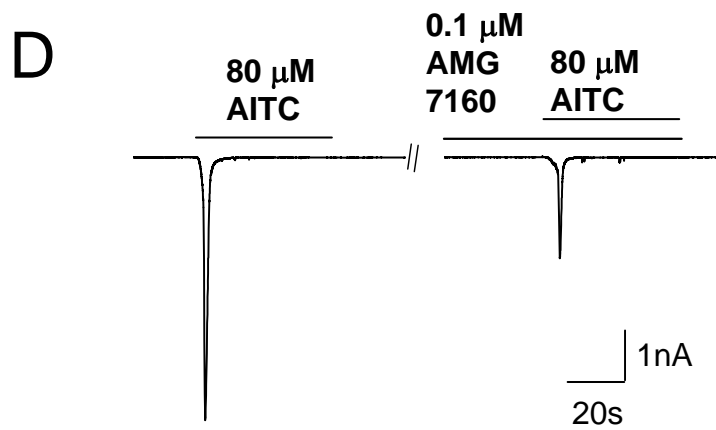

Supplement: MOESM4 [file 9612594]
